# Supplementary material
Source: PubMed Central journal article supplement (PMC8292186)
Supplement: NIHMS1699643-supplement-1.pdf [file NIHMS1699643-supplement-1.pdf]

## Supplementary material

**Supplementary Figure 1. The cumulative exposure-response curves for differences in birth weight, associated with weekly temperature and PM<sub>2.5</sub> exposures in pregnancy.**

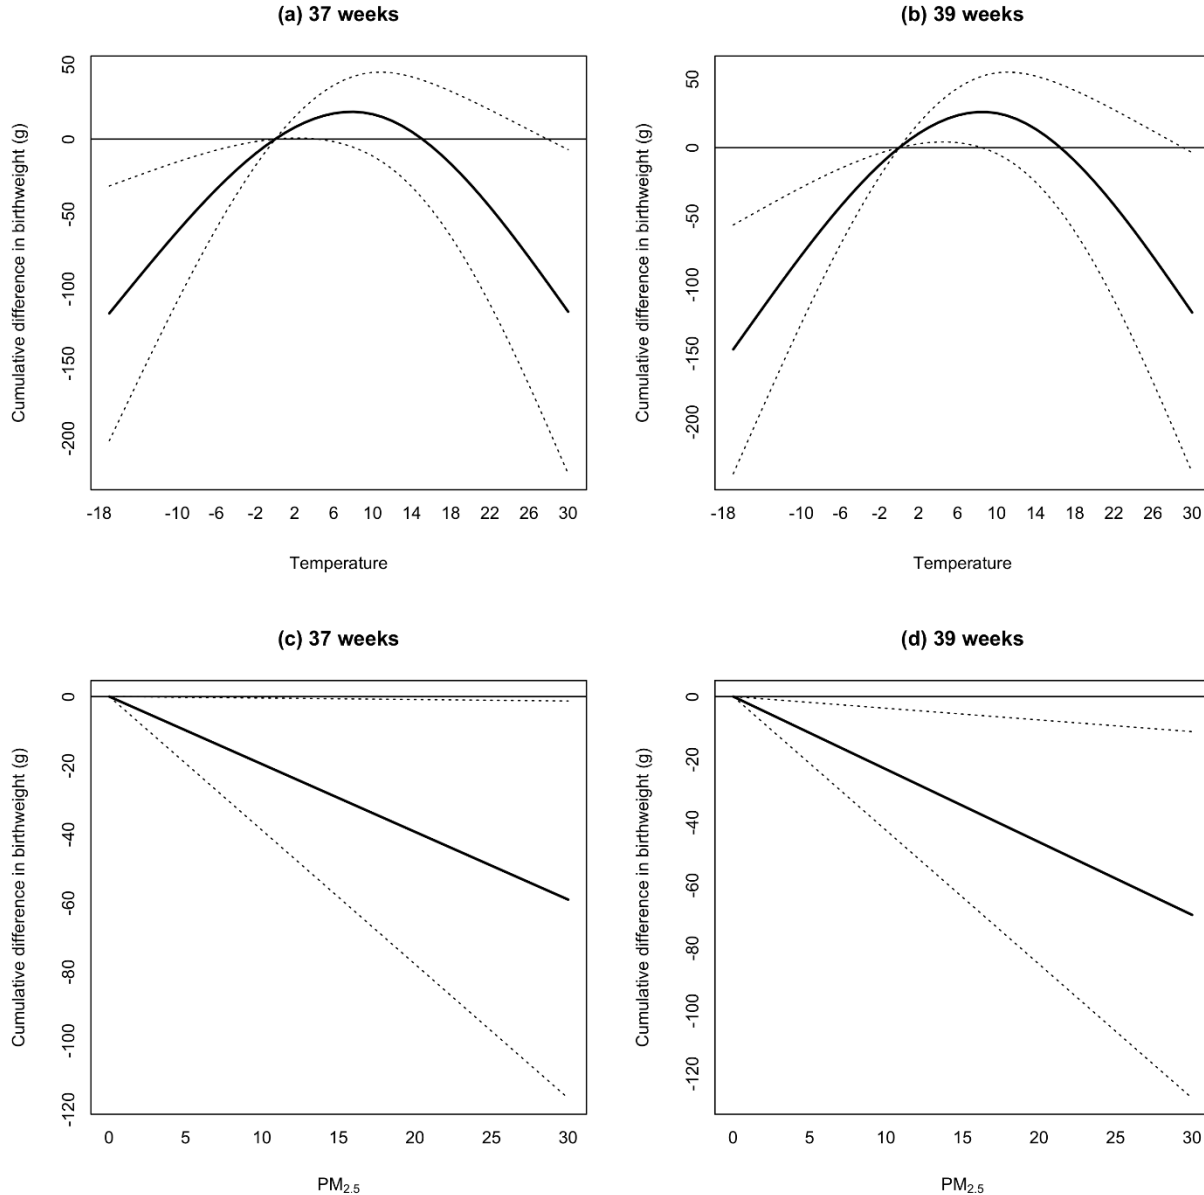

Supplementary Figure 1 shows: (a) the net effects of temperature exposure across 37 weeks of gestation; (b) the net effects of temperature exposure across 39 weeks of gestation; (c) the net effects of PM<sub>2.5</sub> exposure across 37 weeks of gestation; and (d) the net effects of PM<sub>2.5</sub> exposure across 39 weeks of gestation. All analyses were conducted among a subcohort of women who gave birth at 39 weeks of gestation.

**Supplementary Figure 2. The cumulative exposure-response curves for differences in birth weight, associated with weekly temperature and PM<sub>2.5</sub> exposures in pregnancy, by race.**

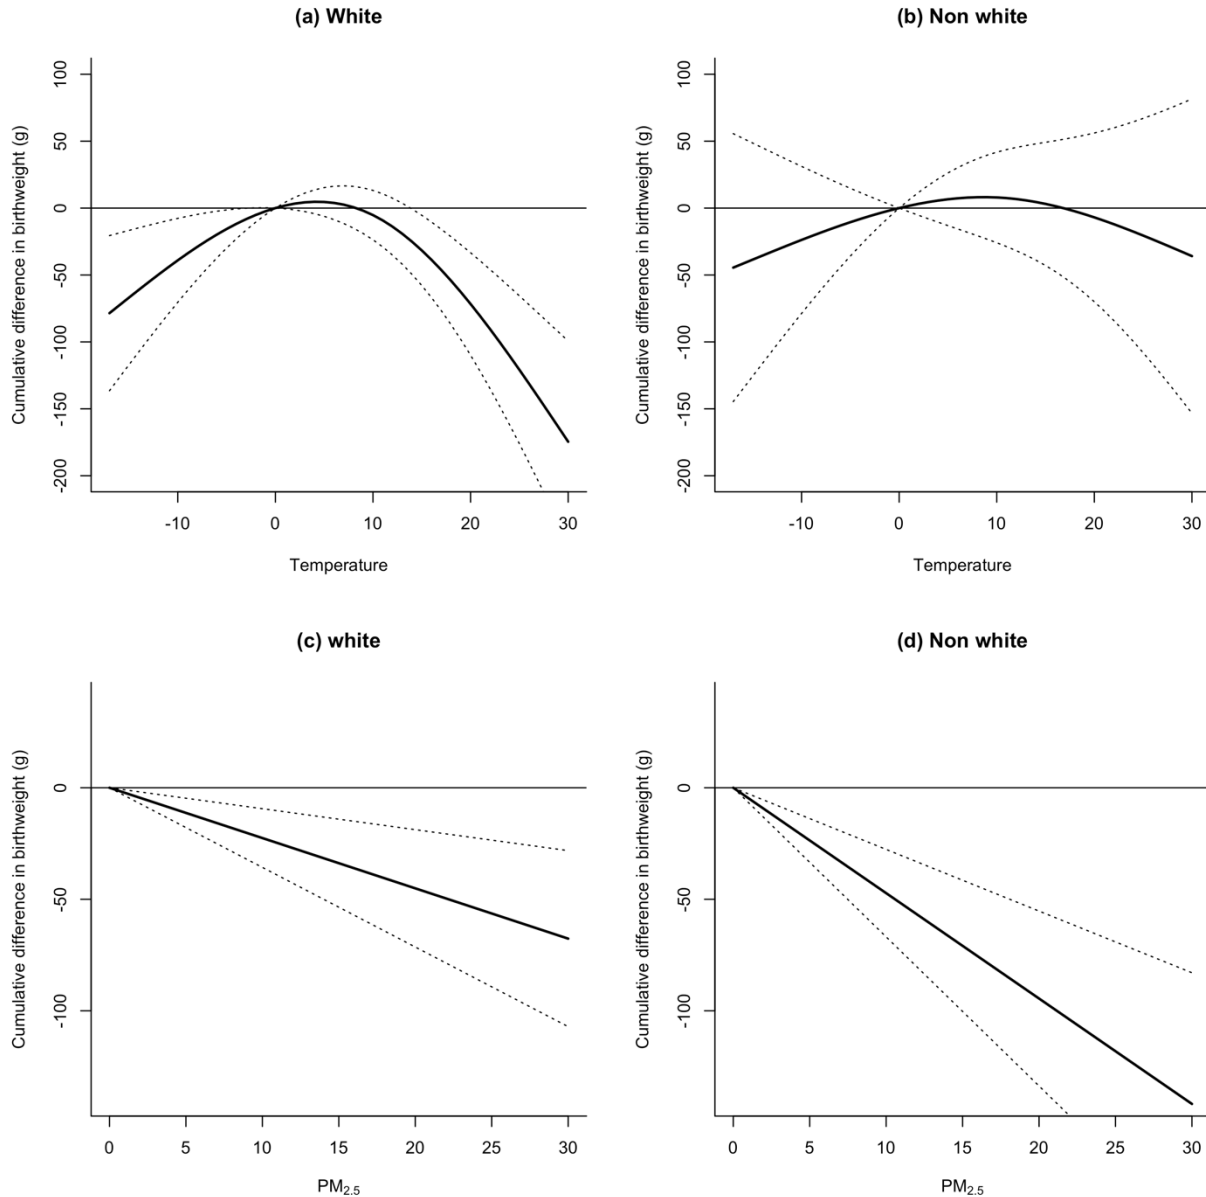

Supplementary Figure 2 shows: (a) the net effects of temperature exposure across 37 weeks of gestation among the white population; (b) the net effects of temperature exposure across 37 weeks of gestation among the non-white population; (c) the net effects of PM<sub>2.5</sub> exposure across 37 weeks of gestation among the white population; and (d) the net effects of PM<sub>2.5</sub> exposure across 37 weeks of gestation among the non-white population.

**Supplementary Figure 3. The cumulative exposure-response curves for differences in birth weight, associated with weekly temperature and PM<sub>2.5</sub> exposures in pregnancy, by governmental support for prenatal care.**

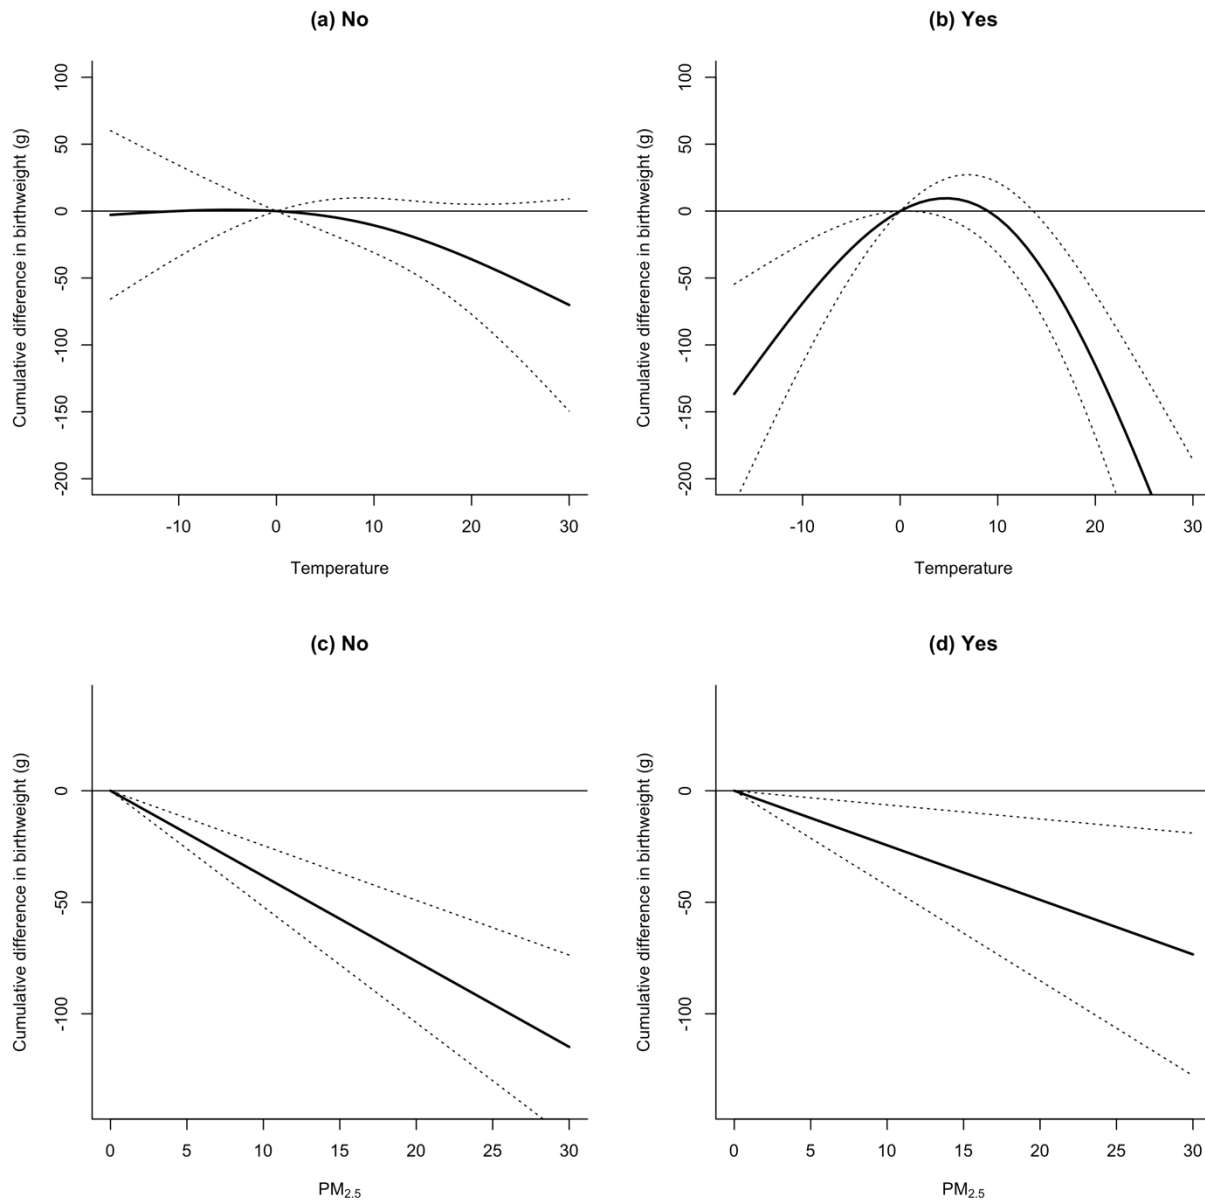

Supplementary Figure 3 shows: (a) the net effects of temperature exposure across 37 weeks of gestation among women who do not receive governmental support for prenatal care; (b) the net effects of temperature exposure across 37 weeks of gestation among women who receive governmental support for prenatal care; (c) the net effects of PM<sub>2.5</sub> exposure across 37 weeks of gestation among women who do not receive governmental support for prenatal care; and (d) the net effects of PM<sub>2.5</sub> exposure across 37 weeks of gestation among women who receive governmental support for prenatal care.

**Supplementary Figure 4. The cumulative exposure-response curves for differences in birth weight, associated with weekly temperature and PM<sub>2.5</sub> exposures in pregnancy, by newborn sex.**

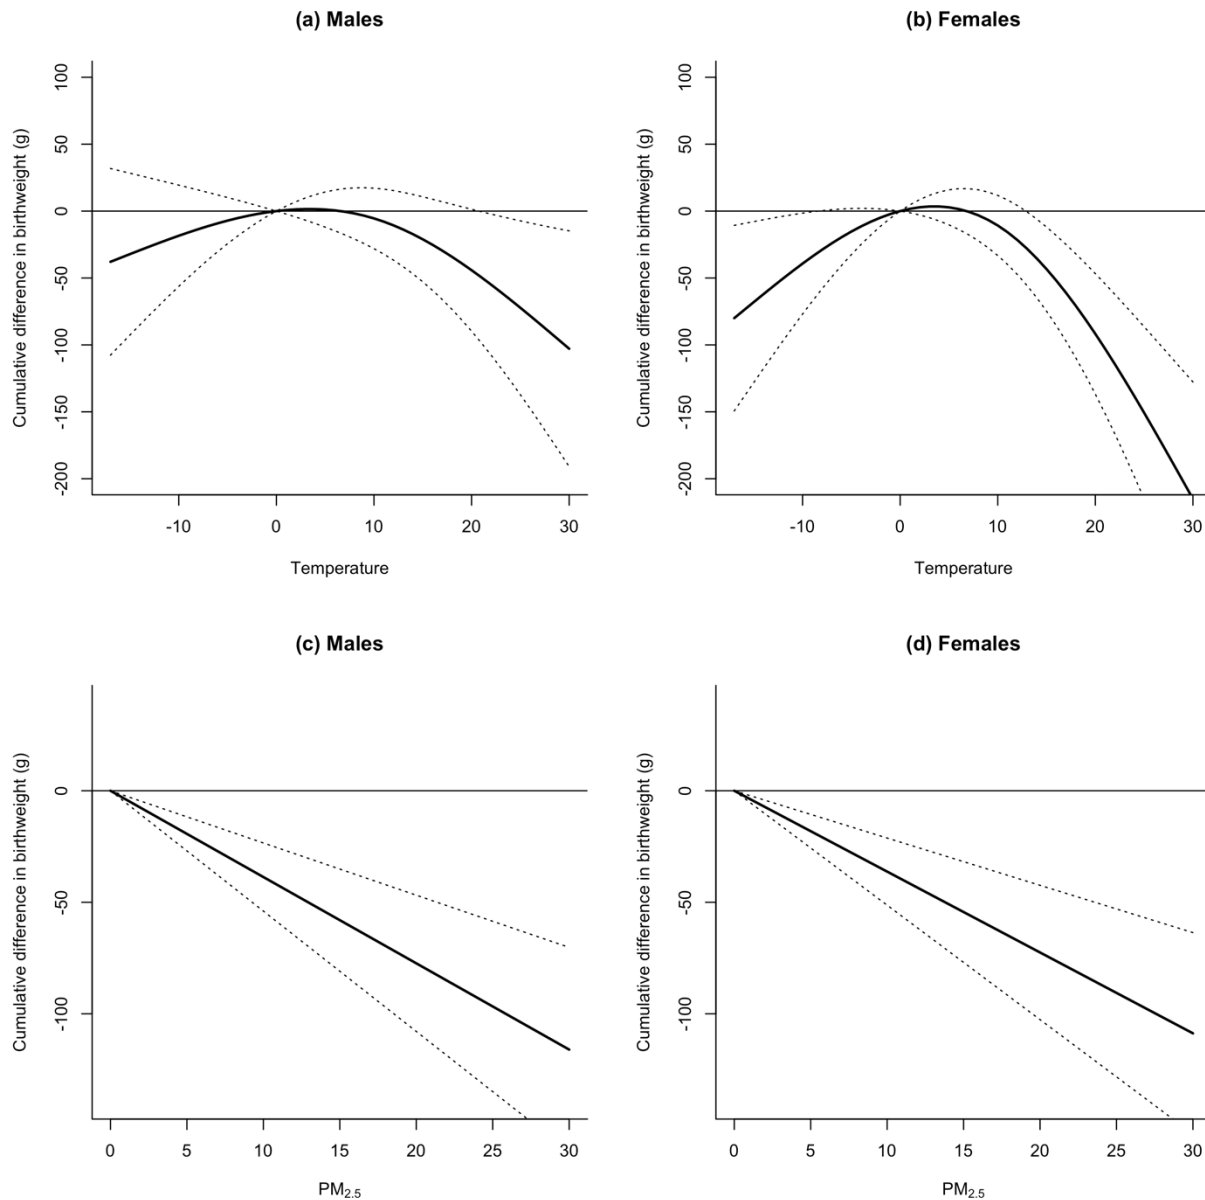

Supplementary Figure 4 shows: (a) the net effects of temperature exposure across 37 weeks of gestation among males; (b) the net effects of temperature exposure across 37 weeks of gestation among females; (c) the net effects of PM<sub>2.5</sub> exposure across 37 weeks of gestation among males; and (d) the net effects of PM<sub>2.5</sub> exposure across 37 weeks of gestation among females.

**Supplementary Table 1.** The difference in TBW associated with one 0 °C in the 5<sup>th</sup> or 95<sup>th</sup> percentile of temperature, or 1 µg/m<sup>3</sup> increase in PM<sub>2.5</sub>, by race, maternal governmental support for prenatal care visits, and newborn sex.

| Sub cohort                                    | Difference in TBW (95% CI)                |                                            |                      |
|-----------------------------------------------|-------------------------------------------|--------------------------------------------|----------------------|
|                                               | 5 <sup>th</sup> percentile of temperature | 95 <sup>th</sup> percentile of temperature | PM <sub>2.5</sub>    |
| <b>Race</b>                                   |                                           |                                            |                      |
| <i>White</i>                                  | 3.5g (0.5g; 6.5g)                         | -10.1g (-14.2g; -5.9g)                     | -2.2g (-3.5g; -0.9g) |
| <i>Non-white</i>                              | 2.2g (-3.0g; 7.5g)                        | -2.8g (-9.3g; 3.5g)                        | -4.7g (-6.7g; -2.7g) |
| <b>Governmental support for prenatal care</b> |                                           |                                            |                      |
| <i>No</i>                                     | -0.1g (-3.3g; 3.2g)                       | -3.4g (-7.7g; 0.9g)                        | -3.8g (-5.2g; -2.4g) |
| <i>Yes</i>                                    | 6.2g (1.9g;10.5g)                         | -17.1g (-22.9g; -11.3g)                    | -2.4g (-4.2g; -0.6g) |
| <b>Newborn sex</b>                            |                                           |                                            |                      |
| <i>Male</i>                                   | 1.6g (-9.7g; 5.2g)                        | -5.7g (-10.6g; -0.9g)                      | -3.8g (-5.4g; -2.3g) |
| <i>Female</i>                                 | 3.5g (-0.1g; 7.1g)                        | -12.1g (-16.9g; -7.3g)                     | -3.6g (-5.1g; -2.1g) |

TBW=term birthweight
